# Supplementary material for: Microbiota Phenotype Promotes Anastomotic Leakage in a Model of Rats with Ischemic Colon Resection
Source: MDPI journal article supplement (doi:10.3390/microorganisms11030680), 2023-03-07
Supplement: s1 [file s1]

**Table S1. Sequences, OTUs and OPUs.** “Nr OPUs filtered” excluded identical values (i.e. zeros) across all samples and features that appear in only one sample. M: control mucosa samples, A: experimental anastomosis samples.

| Sample       | Nr total sequences | Nr OTUs     | Nr OPUs    | Nr OPUs filtered |
|--------------|--------------------|-------------|------------|------------------|
| <b>M1</b>    | 15387              | 132         | 44         | 12               |
| <b>M2</b>    | 10213              | 47          | 15         | 12               |
| <b>M3</b>    | 10659              | 149         | 75         | 67               |
| <b>M4</b>    | 5943               | 65          | 37         | 37               |
| <b>M5</b>    | 15444              | 171         | 83         | 72               |
| <b>M6</b>    | 15606              | 142         | 56         | 49               |
| <b>M7</b>    | 9237               | 132         | 75         | 64               |
| <b>M8</b>    | 26448              | 564         | 13         | 12               |
| <b>M9</b>    | 20689              | 379         | 1          | 1                |
| <b>M10</b>   | 15960              | 224         | 40         | 34               |
| <b>M11</b>   | 15328              | 346         | 18         | 11               |
| <b>M12</b>   | 10774              | 66          | 9          | 8                |
| <b>total</b> | 171688             | 1569        | 210        | 124              |
| <b>Mean</b>  | <b>14307</b>       | <b>201</b>  | <b>39</b>  | <b>32</b>        |
| <b>SD</b>    | 5513               | 154         | 28         | 26               |
| <b>A1</b>    | 12066              | 118         | 49         | 49               |
| <b>A2</b>    | 12960              | 96          | 42         | 40               |
| <b>A3</b>    | 11426              | 122         | 63         | 55               |
| <b>A4</b>    | 12375              | 68          | 39         | 37               |
| <b>A5</b>    | 16833              | 156         | 44         | 39               |
| <b>A6</b>    | 13402              | 138         | 57         | 54               |
| <b>A7</b>    | 16777              | 155         | 48         | 47               |
| <b>A8</b>    | 18107              | 338         | 140        | 108              |
| <b>A9</b>    | 17998              | 157         | 43         | 40               |
| <b>A10</b>   | 14334              | 170         | 50         | 46               |
| <b>A11</b>   | 12944              | 110         | 45         | 43               |
| <b>A12</b>   | 18723              | 110         | 21         | 21               |
| <b>total</b> | 177945             | 1090        | 213        | 151              |
| <b>Mean</b>  | <b>14829</b>       | <b>145</b>  | <b>53</b>  | <b>48</b>        |
| <b>SD</b>    | 2668               | 68          | 29         | 21               |
| <b>TOTAL</b> | <b>349633</b>      | <b>2484</b> | <b>317</b> | <b>169</b>       |

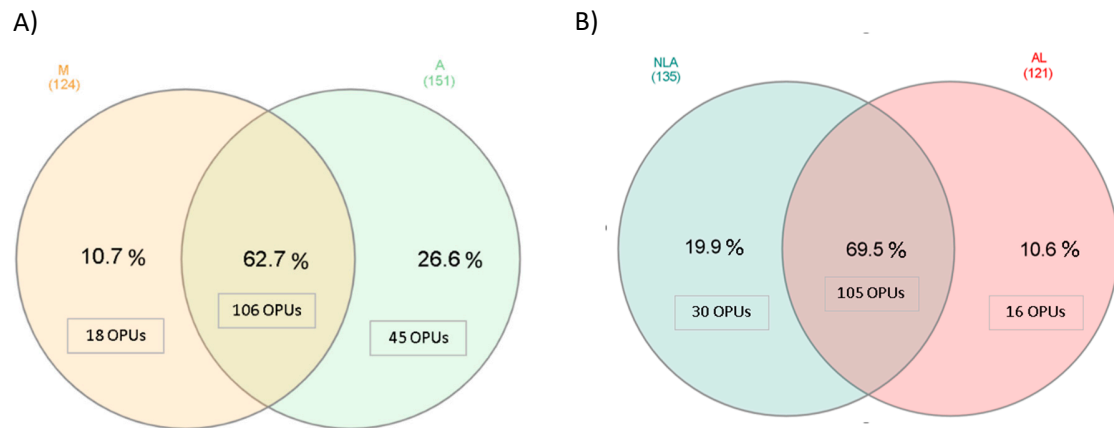

**Figure S1. Venn diagram of OPUs obtained.** These graphics were made after discarding OPUs with identical values in all samples, as well as OPUs present in only one sample. M: control mucosa group, A: experimental anastomosis group, NLA: non-leak anastomosis, AL: anastomotic leak.

**Table S2. Alpha diversity indices.** M: control mucosa samples, A: experimental anastomosis samples.

| Sample      | Chao-1    | Dominance-D index | Shannon–Weiner index | Evenness    |
|-------------|-----------|-------------------|----------------------|-------------|
| <b>M1</b>   | 44        | 0.07              | 3.01                 | 0.46        |
| <b>M2</b>   | 15        | 0.34              | 1.69                 | 0.36        |
| <b>M3</b>   | 75        | 0.09              | 3.07                 | 0.29        |
| <b>M4</b>   | 37        | 0.11              | 2.70                 | 0.40        |
| <b>M5</b>   | 83        | 0.06              | 3.38                 | 0.36        |
| <b>M6</b>   | 56        | 0.15              | 2.75                 | 0.28        |
| <b>M7</b>   | 75        | 0.09              | 3.06                 | 0.29        |
| <b>M8</b>   | 13        | 0.98              | 0.09                 | 0.08        |
| <b>M9</b>   | 1         | 1.00              | 0.00                 | 1.00        |
| <b>M10</b>  | 40        | 0.65              | 0.95                 | 0.06        |
| <b>M11</b>  | 18        | 0.81              | 0.58                 | 0.10        |
| <b>M12</b>  | 9         | 0.62              | 0.77                 | 0.24        |
| <b>Mean</b> | <b>39</b> | <b>0.41</b>       | <b>1.84</b>          | <b>0.33</b> |
| <b>SD</b>   | 28        | 0.37              | 1.29                 | 0.25        |
| <b>A1</b>   | 49        | 0.15              | 2.55                 | 0.26        |
| <b>A2</b>   | 42        | 0.10              | 2.73                 | 0.37        |
| <b>A3</b>   | 63        | 0.21              | 2.38                 | 0.17        |
| <b>A4</b>   | 39        | 0.18              | 2.41                 | 0.29        |
| <b>A5</b>   | 44        | 0.65              | 1.05                 | 0.06        |
| <b>A6</b>   | 57        | 0.10              | 2.81                 | 0.29        |
| <b>A7</b>   | 48        | 0.41              | 1.66                 | 0.11        |
| <b>A8</b>   | 140       | 0.04              | 3.79                 | 0.32        |
| <b>A9</b>   | 43        | 0.27              | 1.56                 | 0.11        |
| <b>A10</b>  | 50        | 0.47              | 1.35                 | 0.08        |
| <b>A11</b>  | 45        | 0.19              | 2.18                 | 0.20        |
| <b>A12</b>  | 21        | 0.21              | 1.90                 | 0.32        |
| <b>Mean</b> | <b>53</b> | <b>0.25</b>       | <b>2.20</b>          | <b>0.21</b> |
| <b>SD</b>   | 29        | 0.18              | 0.75                 | 0.11        |

**Table S3. Heat tree data of taxonomic differences between A and M.** Result from comparison between microbial communities of Figure 3. Statistically, Wilcoxon Rank Sum test  $p < 0.05$ . M: control, A: anastomosis. “p”=phylum, “c”=class, “o”=order, “f”=family, “g”=genus, “s”=species.

| tax_rank | tax_name                            | G1 | G2 | log2_median_ratio | median_diff | mean_diff | wilcox_p_value |
|----------|-------------------------------------|----|----|-------------------|-------------|-----------|----------------|
| p        | Fusobacteriata                      | A  | M  | Inf               | 0.0056537   | 0.016737  | 0.000964       |
| p        | Campylobacterota                    | A  | M  | -6.775942901      | -0.4878357  | -0.491993 | 0.003407       |
| p        | Firmicutes                          | A  | M  | 1.042100162       | 0.2089626   | 0.226212  | 0.020489       |
| p        | Proteobacteria                      | A  | M  | 1.471870751       | 0.1571441   | 0.132335  | 0.026197       |
| c        | Fusobacteriia                       | A  | M  | Inf               | 0.0056537   | 0.016737  | 0.000964       |
| c        | Campylobacteriia                    | A  | M  | -6.775942901      | -0.4878357  | -0.491993 | 0.003407       |
| c        | Bacilli                             | A  | M  | 3.15323081        | 0.2624777   | 0.191711  | 0.017271       |
| c        | Gammaproteobacteria                 | A  | M  | 1.462988704       | 0.1556358   | 0.136881  | 0.022459       |
| c        | Negativicutes                       | A  | M  | 3.116655648       | 0.0477196   | 0.039915  | 0.039536       |
| o        | Fusobacteriales                     | A  | M  | Inf               | 0.0056537   | 0.016737  | 0.000964       |
| o        | Rhodospirillales                    | A  | M  | Inf               | 0.0005718   | 0.004350  | 0.001084       |
| o        | Staphylococcales                    | A  | M  | Inf               | 0.1879922   | 0.225497  | 0.001849       |
| o        | Campylobacterales                   | A  | M  | -6.775942901      | -0.4878357  | -0.491993 | 0.003407       |
| o        | Acidaminococcales                   | A  | M  | Inf               | 0.0146038   | 0.020108  | 0.003929       |
| o        | Enterobacterales                    | A  | M  | 5.243994683       | 0.2377824   | 0.154125  | 0.005880       |
| o        | RF39                                | A  | M  | Inf               | 0.0006630   | 0.001313  | 0.030982       |
| o        | Xanthomonadales                     | A  | M  | 0                 | 0.0000000   | -0.009254 | 0.036687       |
| f        | Gemellaceae                         | A  | M  | Inf               | 0.1879922   | 0.267173  | 0.000038       |
| f        | Pasteurellaceae                     | A  | M  | Inf               | 0.0806828   | 0.126894  | 0.000052       |
| f        | Fusobacteriaceae                    | A  | M  | Inf               | 0.0056537   | 0.016737  | 0.000964       |
| f        | Helicobacteraceae                   | A  | M  | -6.775942901      | -0.4878357  | -0.491993 | 0.003407       |
| f        | Acidaminococcaceae                  | A  | M  | Inf               | 0.0146038   | 0.020108  | 0.003929       |
| f        | Bacteroidales_1                     | A  | M  | Inf               | 0.0002320   | 0.001015  | 0.007054       |
| f        | Bacteroidaceae                      | A  | M  | 5.618467188       | 0.1668760   | 0.154478  | 0.011654       |
| f        | Rikenellaceae                       | A  | M  | Inf               | 0.0013822   | 0.002167  | 0.013072       |
| f        | Carnobacteriaceae                   | A  | M  | Inf               | 0.0010055   | 0.005052  | 0.033976       |
| f        | Streptococcaceae                    | A  | M  | 0                 | 0.0000000   | 0.002554  | 0.036687       |
| f        | Staphylococcaceae                   | A  | M  | 0                 | 0.0000000   | -0.041676 | 0.036687       |
| f        | Xanthomonadaceae                    | A  | M  | 0                 | 0.0000000   | -0.009254 | 0.036687       |
| f        | Rhodospirillales_3                  | A  | M  | 0                 | 0.0000000   | 0.001035  | 0.036687       |
| f        | Rhodospirillales_4                  | A  | M  | 0                 | 0.0000000   | 0.002979  | 0.036687       |
| f        | RF39_5                              | A  | M  | 0                 | 0.0000000   | 0.000542  | 0.036687       |
| f        | RF39_6                              | A  | M  | 0                 | 0.0000000   | 0.000529  | 0.036687       |
| g        | Gemella                             | A  | M  | Inf               | 0.1879922   | 0.267173  | 0.000038       |
| g        | Rodentibacter                       | A  | M  | Inf               | 0.0806828   | 0.126894  | 0.000052       |
| g        | Fusobacterium                       | A  | M  | Inf               | 0.0056537   | 0.016737  | 0.000964       |
| g        | Helicobacter                        | A  | M  | -6.775942901      | -0.4878357  | -0.491993 | 0.003407       |
| g        | Phascolarctobacterium               | A  | M  | Inf               | 0.0146038   | 0.020108  | 0.003929       |
| g        | Bacteroidales_1                     | A  | M  | Inf               | 0.0002320   | 0.001015  | 0.007054       |
| g        | Bacteroides                         | A  | M  | 5.618467188       | 0.1668760   | 0.154478  | 0.011654       |
| g        | Prevotellaceae_1                    | A  | M  | 0                 | 0.0000000   | 0.001209  | 0.016473       |
| g        | Sphaerochaeta                       | A  | M  | 0                 | 0.0000000   | 0.000586  | 0.016473       |
| g        | UCG_008                             | A  | M  | 0                 | 0.0000000   | 0.000422  | 0.016473       |
| g        | Carnobacteriaceae_1                 | A  | M  | Inf               | 0.0010055   | 0.005052  | 0.033976       |
| g        | Facklamia                           | A  | M  | 0                 | 0.0000000   | -0.027586 | 0.036687       |
| g        | Globicatella                        | A  | M  | 0                 | 0.0000000   | 0.002705  | 0.036687       |
| g        | Streptococcus                       | A  | M  | 0                 | 0.0000000   | 0.002554  | 0.036687       |
| g        | Jeitgalicoccus                      | A  | M  | 0                 | 0.0000000   | -0.011633 | 0.036687       |
| g        | Xanthomonadaceae_1                  | A  | M  | 0                 | 0.0000000   | -0.009254 | 0.036687       |
| g        | Rhodospirillales_3                  | A  | M  | 0                 | 0.0000000   | 0.001035  | 0.036687       |
| g        | Rhodospirillales_4                  | A  | M  | 0                 | 0.0000000   | 0.002979  | 0.036687       |
| g        | RF39_5                              | A  | M  | 0                 | 0.0000000   | 0.000542  | 0.036687       |
| g        | RF39_6                              | A  | M  | 0                 | 0.0000000   | 0.000529  | 0.036687       |
| g        | Johnsonella                         | A  | M  | 0                 | 0.0000000   | 0.000219  | 0.036687       |
| s        | Gemella_palaticanis                 | A  | M  | Inf               | 0.1879922   | 0.267173  | 0.000038       |
| s        | Rodentibacter_ratti                 | A  | M  | Inf               | 0.0276695   | 0.088834  | 0.000079       |
| s        | Bacteroides_sartorii                | A  | M  | Inf               | 0.0489763   | 0.074472  | 0.000505       |
| s        | Fusobacterium_gastrusuis            | A  | M  | Inf               | 0.0056537   | 0.016737  | 0.000964       |
| s        | Bacteroides_uniformis               | A  | M  | Inf               | 0.0009443   | 0.006443  | 0.001084       |
| s        | Rodentibacter_4                     | A  | M  | Inf               | 0.0009632   | 0.012824  | 0.002856       |
| s        | Phascolarctobacterium_succinatutens | A  | M  | Inf               | 0.0146038   | 0.020108  | 0.003929       |
| s        | Bacteroidales_1                     | A  | M  | Inf               | 0.0002320   | 0.001015  | 0.007054       |
| s        | Rodentibacter_3                     | A  | M  | Inf               | 0.0002707   | 0.011388  | 0.007054       |
| s        | Prevotellaceae_1                    | A  | M  | 0                 | 0.0000000   | 0.001209  | 0.016473       |
| s        | Sphaerochaeta_1                     | A  | M  | 0                 | 0.0000000   | 0.000586  | 0.016473       |
| s        | Rodentibacter_6                     | A  | M  | 0                 | 0.0000000   | 0.005194  | 0.016473       |
| s        | UCG_008_1                           | A  | M  | 0                 | 0.0000000   | 0.000422  | 0.016473       |
| s        | Helicobacter_muridarum              | A  | M  | 0                 | -0.0116239  | -0.098321 | 0.028503       |
| s        | Carnobacteriaceae_1                 | A  | M  | Inf               | 0.0010055   | 0.005052  | 0.033976       |
| s        | Facklamia_tabacinasalis             | A  | M  | 0                 | 0.0000000   | -0.027586 | 0.036687       |
| s        | Globicatella_1                      | A  | M  | 0                 | 0.0000000   | 0.002705  | 0.036687       |
| s        | Streptococcus_1                     | A  | M  | 0                 | 0.0000000   | 0.002554  | 0.036687       |
| s        | Jeitgalicoccus_nanhaiensis          | A  | M  | 0                 | 0.0000000   | -0.011633 | 0.036687       |
| s        | Allaprevotella_2                    | A  | M  | 0                 | 0.0000000   | 0.000370  | 0.036687       |
| s        | Escherichia_cali_4                  | A  | M  | 0                 | 0.0000000   | 0.001599  | 0.036687       |
| s        | Escherichia_Shipella_2              | A  | M  | 0                 | 0.0000000   | 0.003043  | 0.036687       |
| s        | Rodentibacter_1                     | A  | M  | 0                 | 0.0000000   | 0.009411  | 0.036687       |
| s        | Xanthomonadaceae_1                  | A  | M  | 0                 | 0.0000000   | -0.009254 | 0.036687       |
| s        | Rhodospirillales_3                  | A  | M  | 0                 | 0.0000000   | 0.001035  | 0.036687       |
| s        | Rhodospirillales_4                  | A  | M  | 0                 | 0.0000000   | 0.002979  | 0.036687       |
| s        | RF39_5                              | A  | M  | 0                 | 0.0000000   | 0.000542  | 0.036687       |
| s        | RF39_6                              | A  | M  | 0                 | 0.0000000   | 0.000529  | 0.036687       |
| s        | Johnsonella_1                       | A  | M  | 0                 | 0.0000000   | 0.000219  | 0.036687       |
| s        | Oribacterium_1                      | A  | M  | 0                 | 0.0000000   | 0.000514  | 0.036687       |
| s        | Rikenellaceae_RC9_gut_group_3       | A  | M  | Inf               | 0.0005239   | 0.001617  | 0.040513       |
| s        | Helicobacter_1                      | A  | M  | 0                 | -0.0208354  | -0.311105 | 0.041607       |
| s        | Bacteroides_acidifaciens            | A  | M  | Inf               | 0.0049116   | 0.007562  | 0.048481       |

**Table S4. Data summary of LEfSe analysis between A and M.** Data of taxonomic differences between A and M from Figure 5A. LEfSe/LDA score >2, and a raw P value cutoff of 0.05, Kruskal-Wallis test. M: control, A: anastomosis.

| OPI     | Species                                    | P values | FDR          | A       | M       | LDA score |
|---------|--------------------------------------------|----------|--------------|---------|---------|-----------|
| OPI_138 | <i>Gemella_palaticanis</i>                 | 0.00003  | <b>0.005</b> | 2672200 | 0       | 6.1       |
| OPI_334 | <i>Rodentibacter_ratti</i>                 | 0.00007  | <b>0.006</b> | 890820  | 2366    | 5.7       |
| OPI_172 | <i>Bacteroides_sartorii</i>                | 0.00045  | <b>0.025</b> | 829660  | 84909   | 5.6       |
| OPI_48  | <i>Phascolarctobacterium_succinatutens</i> | 0.00357  | 0.085        | 207440  | 6341.7  | 5.0       |
| OPI_325 | <i>Fusobacterium_gastrosuis</i>            | 0.00086  | <b>0.032</b> | 174210  | 6810.9  | 4.9       |
| OPI_338 | <i>Rodentibacter_4</i>                     | 0.00254  | 0.070        | 128390  | 0       | 4.8       |
| OPI_337 | <i>Rodentibacter_3</i>                     | 0.00629  | 0.116        | 114050  | 0       | 4.8       |
| OPI_335 | <i>Rodentibacter_1</i>                     | 0.03287  | 0.182        | 94320   | 0       | 4.7       |
| OPI_167 | <i>Bacteroides_acidifaciens</i>            | 0.04513  | 0.227        | 100350  | 24660   | 4.6       |
| OPI_170 | <i>Bacteroides_uniformis</i>               | 0.00096  | <b>0.032</b> | 64426   | 0       | 4.5       |
| OPI_340 | <i>Rodentibacter_6</i>                     | 0.01473  | 0.182        | 52015   | 0       | 4.4       |
| OPI_122 | <i>Carnobacteriaceae_1</i>                 | 0.03106  | 0.182        | 53878   | 3356.4  | 4.4       |
| OPI_332 | <i>Escherichia_Shigella_2</i>              | 0.03287  | 0.182        | 30448   | 0       | 4.2       |
| OPI_358 | <i>Rhodospirillales_4</i>                  | 0.03287  | 0.182        | 29812   | 0       | 4.2       |
| OPI_126 | <i>Globicatella_1</i>                      | 0.03287  | 0.182        | 27047   | 0       | 4.1       |
| OPI_127 | <i>Streptococcus_1</i>                     | 0.03287  | 0.182        | 25539   | 0       | 4.1       |
| OPI_314 | <i>Rikenellaceae_RC9_gut_group_3</i>       | 0.03712  | 0.199        | 17960   | 1783.4  | 3.9       |
| OPI_330 | <i>Escherichia_coli_4</i>                  | 0.03287  | 0.182        | 16006   | 0       | 3.9       |
| OPI_157 | <i>Prevotellaceae_1</i>                    | 0.01473  | 0.182        | 12113   | 0       | 3.8       |
| OPI_308 | <i>Bacteroidales_1</i>                     | 0.00629  | 0.116        | 10152   | 0       | 3.7       |
| OPI_357 | <i>Rhodospirillales_3</i>                  | 0.03287  | 0.182        | 10349   | 0       | 3.7       |
| OPI_323 | <i>Sphaerochaeta_1</i>                     | 0.01473  | 0.182        | 5860.9  | 0       | 3.5       |
| OPI_383 | <i>RF39_5</i>                              | 0.03287  | 0.182        | 5424.5  | 0       | 3.4       |
| OPI_384 | <i>RF39_6</i>                              | 0.03287  | 0.182        | 5294.2  | 0       | 3.4       |
| OPI_94  | <i>Oribacterium_1</i>                      | 0.03287  | 0.182        | 5146.6  | 0       | 3.4       |
| OPI_37  | <i>UCG_008_1</i>                           | 0.01473  | 0.182        | 4218.3  | 0       | 3.3       |
| OPI_179 | <i>Alloprevotella_2</i>                    | 0.03287  | 0.182        | 3702    | 0       | 3.3       |
| OPI_91  | <i>Johnsonella_1</i>                       | 0.03287  | 0.182        | 2186.2  | 0       | 3.0       |
| OPI_353 | <i>Xanthomonadaceae_1</i>                  | 0.03287  | 0.182        | 0       | 97310   | -4.7      |
| OPI_137 | <i>Jeotgalicoccus_nanhaiensis</i>          | 0.03287  | 0.182        | 0       | 123270  | -4.8      |
| OPI_125 | <i>Facklamia_tabacinasalis</i>             | 0.03287  | 0.182        | 0       | 292480  | -5.2      |
| OPI_362 | <i>Helicobacter_muridarum</i>              | 0.02634  | 0.182        | 25595   | 1011500 | -5.7      |
| OPI_361 | <i>Helicobacter_1</i>                      | 0.03870  | 0.201        | 71139   | 3195300 | -6.2      |

**Table S5. Correlation coefficients results between A and M.** Correlation values in Figure 5B are shown. Taxon 1 correspond to species highlighted in Figure 5, with a LEfSe-LDA score >2 and a FDR-adjusted P value < 0.05. Taxon 2 correspond to species with LEfSe/LDA score >2, and a raw P value cutoff < 0.05, Kruskal-Wallis test.

| <b>Taxon 1</b>                  | <b>Taxon 2</b>                            | <b>Correlation</b> | <b>P Value</b> |
|---------------------------------|-------------------------------------------|--------------------|----------------|
| <i>Gemella_palaticanis</i>      | <i>Rodentibacter_ratti</i>                | 0.8373             | 0.0099         |
| <i>Gemella_palaticanis</i>      | <i>Bacteroides_uniformis</i>              | 0.561              | 0.0198         |
| <i>Gemella_palaticanis</i>      | <i>Rodentibacter_4</i>                    | 0.4474             | 0.0495         |
| <i>Gemella_palaticanis</i>      | <i>Phascolarctbacterium_succinatutens</i> | 0.4079             | 0.0198         |
| <i>Gemella_palaticanis</i>      | <i>Jeotgalicoccus_nanhaiensis</i>         | -0.4422            | 0.0198         |
| <i>Gemella_palaticanis</i>      | <i>Facklamia_tabacinasalis</i>            | -0.4685            | 0.0297         |
| <i>Gemella_palaticanis</i>      | <i>Xanthomonadaceae_1</i>                 | -0.469             | 0.0297         |
| <i>Gemella_palaticanis</i>      | <i>Helicobacter_muridarum</i>             | -0.5158            | 0.0099         |
| <i>Rodentibacter_ratti</i>      | <i>Gemella_palaticanis</i>                | 0.8373             | 0.0099         |
| <i>Rodentibacter_ratti</i>      | <i>Bacteroides_uniformis</i>              | 0.5348             | 0.0198         |
| <i>Rodentibacter_ratti</i>      | <i>Fusobacterium_gastrosuis</i>           | 0.412              | 0.0396         |
| <i>Rodentibacter_ratti</i>      | <i>Rodentibacter_4</i>                    | 0.4013             | 0.0198         |
| <i>Rodentibacter_ratti</i>      | <i>Helicobacter_muridarum</i>             | -0.445             | 0.0297         |
| <i>Bacteroides_sartorii</i>     | <i>Bacteroides_acidifaciens</i>           | 0.6415             | 0.0099         |
| <i>Bacteroides_sartorii</i>     | <i>Helicobacter_1</i>                     | -0.3869            | 0.0495         |
| <i>Fusobacterium_gastrosuis</i> | <i>Rodentibacter_ratti</i>                | 0.412              | 0.0396         |
| <i>Fusobacterium_gastrosuis</i> | <i>Helicobacter_1</i>                     | -0.3983            | 0.0297         |
| <i>Bacteroides_uniformis</i>    | <i>Gemella_palaticanis</i>                | 0.561              | 0.0198         |
| <i>Bacteroides_uniformis</i>    | <i>Rodentibacter_ratti</i>                | 0.5348             | 0.0198         |
| <i>Bacteroides_uniformis</i>    | <i>Rodentibacter_4</i>                    | 0.4743             | 0.0297         |
| <i>Bacteroides_uniformis</i>    | <i>RF39_5</i>                             | -0.412             | 0.0495         |
| <i>Bacteroides_uniformis</i>    | <i>Rodentibacter_1</i>                    | -0.4128            | 0.0297         |
| <i>Bacteroides_uniformis</i>    | <i>UCG_008_1</i>                          | -0.4378            | 0.0297         |
| <i>Bacteroides_uniformis</i>    | <i>Helicobacter_muridarum</i>             | -0.5107            | 0.0099         |

Table S6. Microbial respiration of microbiota. A: anastomosis experimental group, M: control group.

| Microbial respiration of microbiota, relative abundances (%) |      |      |      |      |      |      |      |      |      |      |      |      |      |      |      |      |      |      |      |      |       |      |      |      |
|--------------------------------------------------------------|------|------|------|------|------|------|------|------|------|------|------|------|------|------|------|------|------|------|------|------|-------|------|------|------|
|                                                              | A01  | A02  | A03  | A04  | A05  | A06  | A07  | A08  | A09  | A10  | A11  | A12  | M01  | M02  | M03  | M04  | M05  | M06  | M07  | M08  | M09   | M10  | M11  | M12  |
| Aerobes                                                      | 0.0  | 0.0  | 0.0  | 0.0  | 0.0  | 0.0  | 0.0  | 0.0  | 0.0  | 0.0  | 0.0  | 0.0  | 23.2 | 11.5 | 0.0  | 0.0  | 1.5  | 0.4  | 0.0  | 0.1  | 0.0   | 0.0  | 0.0  | 0.0  |
| Facultative anaerobes                                        | 9.4  | 58.3 | 57.6 | 37.0 | 82.5 | 36.8 | 66.3 | 47.8 | 56.3 | 20.4 | 47.3 | 71.4 | 65.4 | 22.5 | 15.1 | 19.2 | 19.6 | 10.7 | 12.1 | 0.4  | 0.0   | 1.8  | 1.3  | 0.0  |
| Obligate anaerobes                                           | 90.0 | 41.7 | 35.6 | 56.2 | 13.4 | 59.0 | 32.8 | 39.6 | 43.1 | 78.9 | 44.5 | 28.6 | 0.8  | 0.5  | 82.8 | 80.8 | 64.6 | 53.2 | 54.7 | 0.3  | 0.0   | 4.8  | 2.7  | 0.8  |
| Microaerophiles                                              | 0.2  | 0.0  | 2.5  | 6.4  | 3.3  | 3.4  | 0.7  | 11.0 | 0.1  | 0.3  | 7.5  | 0.0  | 10.7 | 65.4 | 1.7  | 0.0  | 13.4 | 35.5 | 27.0 | 99.2 | 100.0 | 92.9 | 95.5 | 99.2 |
| microaerophile or<br>aerotolerant anaerobes                  | 0.0  | 0.0  | 4.0  | 0.4  | 0.7  | 0.6  | 0.2  | 0.9  | 0.4  | 0.0  | 0.1  | 0.0  | 0.0  | 0.0  | 0.0  | 0.0  | 0.0  | 0.3  | 4.6  | 0.0  | 0.0   | 0.3  | 0.5  | 0.0  |
| Microaerophiles or<br>facultatively anaerobic                | 0.4  | 0.0  | 0.0  | 0.0  | 0.0  | 0.0  | 0.0  | 0.2  | 0.0  | 0.0  | 0.0  | 0.0  | 0.0  | 0.0  | 0.2  | 0.0  | 0.9  | 0.0  | 1.5  | 0.0  | 0.0   | 0.2  | 0.0  | 0.0  |
| ND                                                           | 0.0  | 0.0  | 0.3  | 0.0  | 0.1  | 0.2  | 0.0  | 0.4  | 0.1  | 0.4  | 0.6  | 0.0  | 0.0  | 0.0  | 0.1  | 0.0  | 0.0  | 0.0  | 0.1  | 0.0  | 0.0   | 0.0  | 0.0  | 0.0  |

| Microbial respiration of microbiota, relative abundances (Log10) |     |     |     |     |     |     |     |     |     |     |     |     |     |     |     |     |     |     |     |     |     |     |     |     |
|------------------------------------------------------------------|-----|-----|-----|-----|-----|-----|-----|-----|-----|-----|-----|-----|-----|-----|-----|-----|-----|-----|-----|-----|-----|-----|-----|-----|
|                                                                  | A01 | A02 | A03 | A04 | A05 | A06 | A07 | A08 | A09 | A10 | A11 | A12 | M01 | M02 | M03 | M04 | M05 | M06 | M07 | M08 | M09 | M10 | M11 | M12 |
| Aerobes                                                          | 0.0 | 0.0 | 0.0 | 0.0 | 0.0 | 0.0 | 0.0 | 0.0 | 0.0 | 0.0 | 0.0 | 0.0 | 1.4 | 1.1 | 0.0 | 0.0 | 0.4 | 0.1 | 0.0 | 0.0 | 0.0 | 0.0 | 0.0 | 0.0 |
| Facultative anaerobes                                            | 1.0 | 1.8 | 1.8 | 1.6 | 1.9 | 1.6 | 1.8 | 1.7 | 1.8 | 1.3 | 1.7 | 1.9 | 1.8 | 1.4 | 1.2 | 1.3 | 1.3 | 1.1 | 1.1 | 0.1 | 0.0 | 0.4 | 0.4 | 0.0 |
| Obligate anaerobes                                               | 2.0 | 1.6 | 1.6 | 1.8 | 1.2 | 1.8 | 1.5 | 1.6 | 1.6 | 1.9 | 1.7 | 1.5 | 0.2 | 0.2 | 1.9 | 1.9 | 1.8 | 1.7 | 1.7 | 0.1 | 0.0 | 0.8 | 0.6 | 0.2 |
| Microaerophiles                                                  | 0.1 | 0.0 | 0.5 | 0.9 | 0.6 | 0.6 | 0.2 | 1.1 | 0.0 | 0.1 | 0.9 | 0.0 | 1.1 | 1.8 | 0.4 | 0.0 | 1.2 | 1.6 | 1.4 | 2.0 | 2.0 | 2.0 | 2.0 | 2.0 |
| Microaerophile or<br>aerotolerant anaerobes                      | 0.0 | 0.0 | 0.7 | 0.1 | 0.2 | 0.2 | 0.1 | 0.3 | 0.1 | 0.0 | 0.0 | 0.0 | 0.0 | 0.0 | 0.0 | 0.0 | 0.0 | 0.1 | 0.7 | 0.0 | 0.0 | 0.1 | 0.2 | 0.0 |
| Microaerophiles or<br>facultatively anaerobic                    | 0.2 | 0.0 | 0.0 | 0.0 | 0.0 | 0.0 | 0.0 | 0.1 | 0.0 | 0.0 | 0.0 | 0.0 | 0.0 | 0.0 | 0.1 | 0.0 | 0.3 | 0.0 | 0.4 | 0.0 | 0.0 | 0.1 | 0.0 | 0.0 |
| ND                                                               | 0.0 | 0.0 | 0.1 | 0.0 | 0.1 | 0.1 | 0.0 | 0.1 | 0.0 | 0.1 | 0.2 | 0.0 | 0.0 | 0.0 | 0.1 | 0.0 | 0.0 | 0.0 | 0.1 | 0.0 | 0.0 | 0.0 | 0.0 | 0.0 |

**Table S7. Data summary of LEfSe analysis between NLA and AL.** Data of taxonomic differences between NLA and AL from Figure 8B. LEfSe/LDA score >2, and a raw P value cutoff of 0.05, Kruskal-Wallis test. NLA: non-leak anastomosis, AL: anastomotic leak.

| OPU     | Species                              | P values | FDR     | AL      | NLA    | LDA score |
|---------|--------------------------------------|----------|---------|---------|--------|-----------|
| OPU_365 | <i>Helicobacter_rodentium</i>        | 0.037222 | 0.45694 | 3170.9  | 78507  | 4.58      |
| OPU_114 | <i>Lactobacillus_murinus</i>         | 0.020122 | 0.45694 | 882.53  | 45697  | 4.35      |
| OPU_116 | <i>Ligilactobacillus_1</i>           | 0.036714 | 0.45694 | 0       | 31283  | 4.19      |
| OPU_104 | <i>Lactobacillus_reuteri</i>         | 0.036714 | 0.45694 | 0       | 16714  | 3.92      |
| OPU_355 | <i>Rhodospirillales_1</i>            | 0.036714 | 0.45694 | 0       | 10369  | 3.71      |
| OPU_31  | <i>UCG_005_6</i>                     | 0.036714 | 0.45694 | 0       | 9376.8 | 3.67      |
| OPU_145 | <i>Clostridium_sensu_stricto_1_2</i> | 0.036714 | 0.45694 | 0       | 7009.5 | 3.54      |
| OPU_199 | <i>Muribaculaceae_20</i>             | 0.036714 | 0.45694 | 0       | 1826.1 | 2.96      |
| OPU_209 | <i>Muribaculaceae_30</i>             | 0.036714 | 0.45694 | 0       | 1159.4 | 2.76      |
| OPU_113 | <i>Lactobacillus_2</i>               | 0.038015 | 0.45694 | 51288   | 45881  | -3.43     |
| OPU_138 | <i>Gemella_palaticanis</i>           | 0.04154  | 0.45694 | 3568600 | 893270 | -6.13     |



**Table S8. Correlation coefficient results between NLA and AL.** Correlation values in Figure 8C are shown. LEfSe-LDA score >2 and a raw P value < 0.05, Kruskal-Wallis test.

| <b>Taxon 1</b>                       | <b>Taxon 2</b>                | <b>Correlation</b> | <b>P Value</b> |
|--------------------------------------|-------------------------------|--------------------|----------------|
| <i>Gemella_palaticanis</i>           | <i>Helicobacter_rodentium</i> | -0.6012            | 0.0099         |
| <i>Clostridium_sensu_stricto_1_2</i> | <i>Muribaculaceae_30</i>      | 0.9367             | 0.0099         |
| <i>Ligilactobacillus_1</i>           | <i>Lactobacillus_marinus</i>  | 0.6419             | 0.0396         |
| <i>Lactobacillus_marinus</i>         | <i>Rhodospirillales_1</i>     | 0.5738             | 0.0396         |
| <i>Rhodospirillales_1</i>            | <i>Muribaculaceae_20</i>      | 0.9122             | 0.0099         |
| <i>Rhodospirillales_1</i>            | UCG_005_6                     | 0.926              | 0.0099         |
| <i>Muribaculaceae_20</i>             | UCG_005_6                     | 0.9034             | 0.0099         |
